# Supplementary material for: Effect of external electric fields on the ESDPT process and photophysical properties of 1,8-dihydroxy-2-naphthaldehyde
Source: Royal Society of Chemistry journal article supplement (doi:10.1039/d3cp06175b), 2024-01-01
Supplement: d3cp06175b1.pdf [file d3cp06175b1.pdf]

## **Electronic Supplementary Information for:**

**Effect of the External Electric Field on the ESDPT Process and Photophysical**

**Properties of 1,8-Dihydroxy-2-Naphthalaldehyde**

Xingzhu Tang, Yajie Zang and Chaofan Sun \*

College of Science, Northeast Forestry University, Harbin 150040, Heilongjiang,

China. E-mail: cfsun@nefu.edu.cn

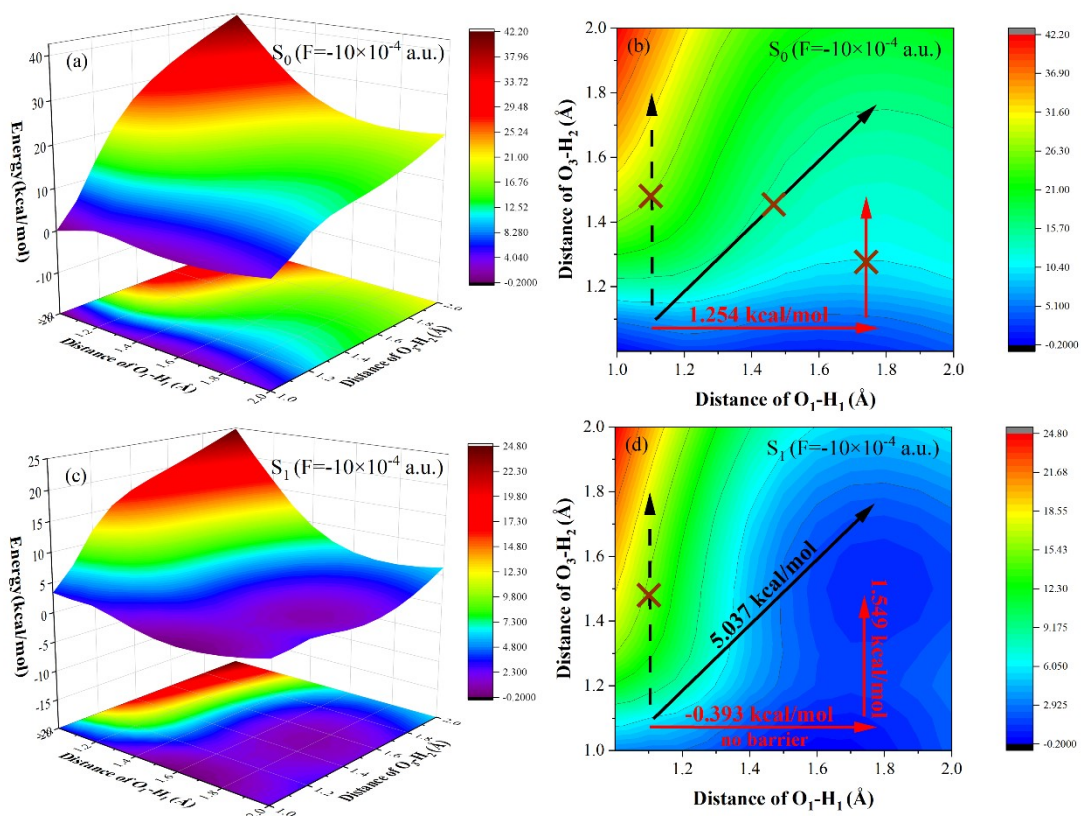

**Figure S1(a).** The scanned PESs in  $S_0$  (a)-(b) and  $S_1$  (c)-(d) states with a negative EEF of  $-10 \times 10^{-4}$  a.u.. Here, the arrows and numbers represent the direction of PT and the energy barrier, respectively.

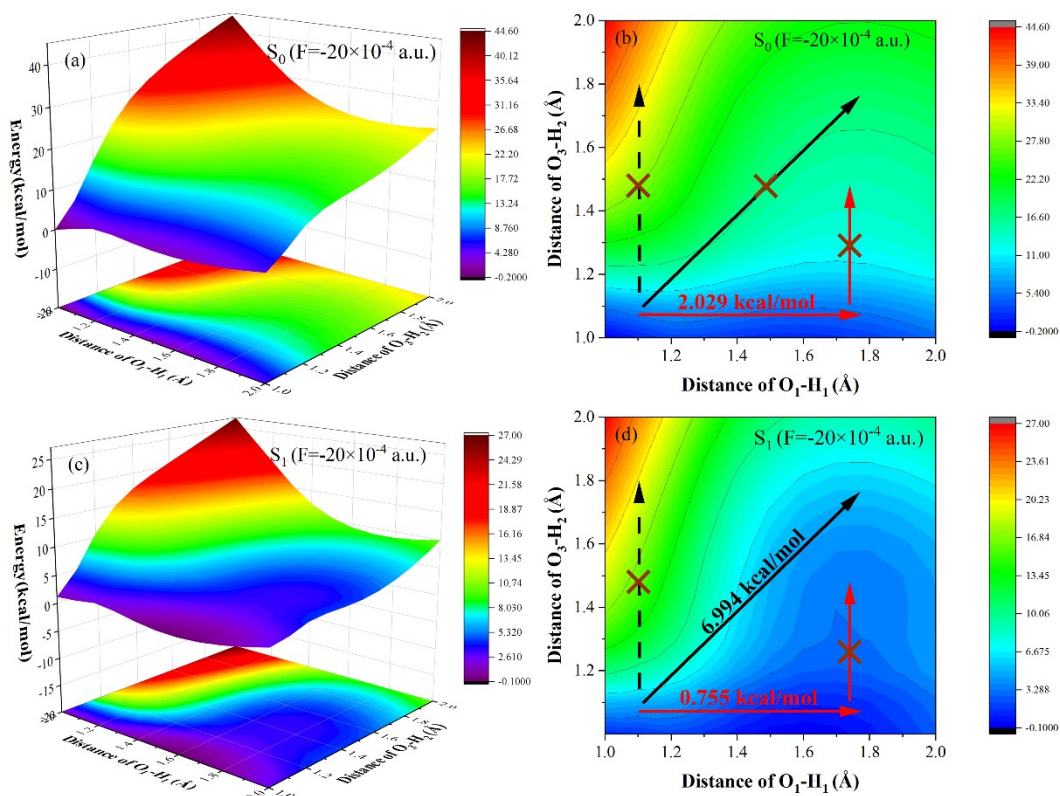

**Figure S1(b).** The scanned PESs in  $S_0$  (a)-(b) and  $S_1$  (c)-(d) states with a negative EEF of  $-20 \times 10^{-4}$  a.u.. Here, the arrows and numbers represent the direction of PT and the energy barrier, respectively.

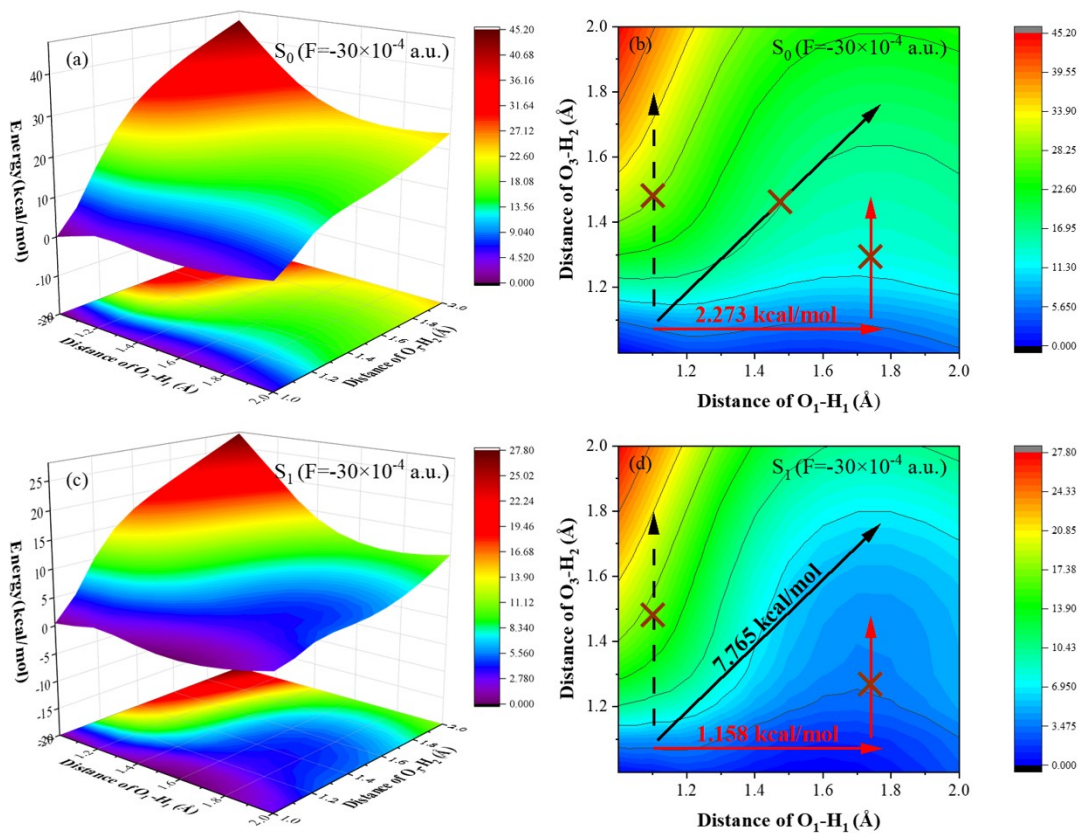

**Figure S1(c).** The scanned PESs in  $S_0$  (a)-(b) and  $S_1$  (c)-(d) states with a negative EEF of  $-30 \times 10^{-4}$  a.u.. Here, the arrows and numbers represent the direction of PT and the energy barrier, respectively.

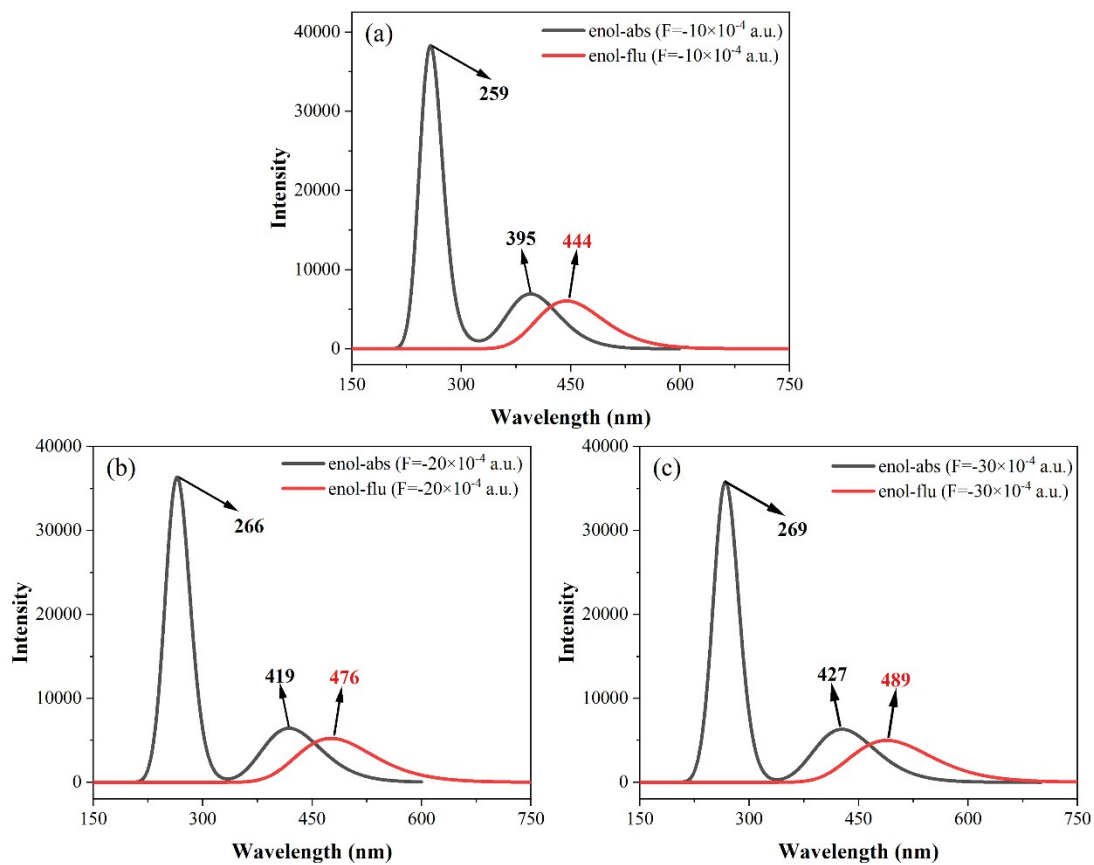

**Figure S2.** Absorption and fluorescence spectra of DHNA in the distinct external electric fields: (a)  $-10 \times 10^{-4}$  a.u.; (b)  $-20 \times 10^{-4}$  a.u.; (d)  $-30 \times 10^{-4}$  a.u..

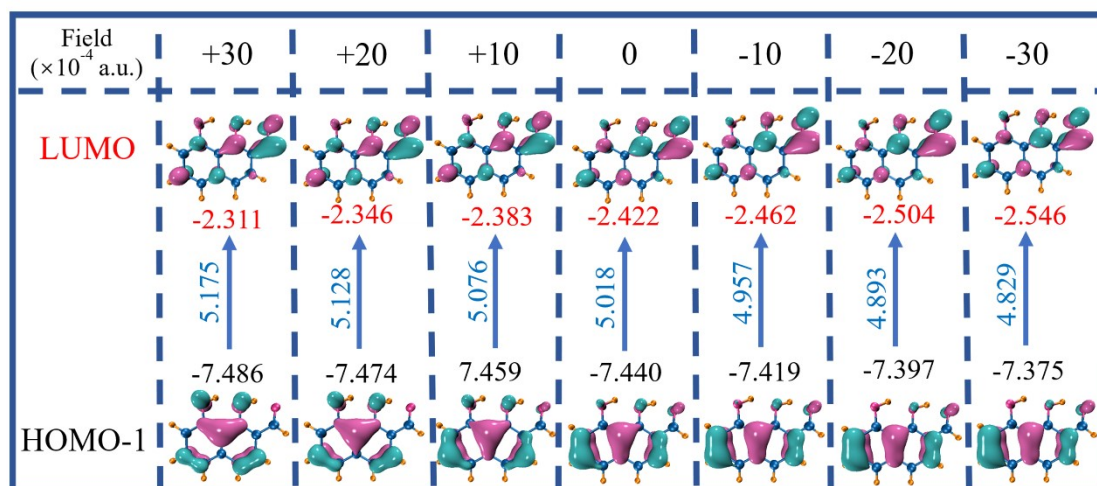

**Figure S3.** HOMO-1, LUMO energies and energy gaps of DHNA in the distinct EEFs (eV).
